# Supplementary material for: Macrocycle-based charge transfer co-crystals with specific selective vapochromism to benzene
Source: Royal Society of Chemistry journal article supplement (doi:10.1039/d4nj02859g), 2024-01-01
Supplement: d4nj02859g1.pdf [file d4nj02859g1.pdf]

## Electronic Supplementary Information

### Macrocyclic-based charge transfer co-crystals with specific selective vapochromism to benzene

Fei Zeng<sup>a,\*</sup>, Lin-Li Tang,<sup>a</sup> and Wen-Hu Bao<sup>a</sup>

<sup>a</sup>College of Chemistry and Bioengineering, Hunan University of Science and Engineering, Yongzhou 425199, China.

*E-mail: zengfei@iccas.ac.cn*

### Contents

|                                                                                                         |           |
|---------------------------------------------------------------------------------------------------------|-----------|
| <b>1. Materials and Methods.....</b>                                                                    | <b>2</b>  |
| <b>2. Characterization of Macrocyclic-Based CT Cocrystals .....</b>                                     | <b>3</b>  |
| <b>3. PXRD patterns and UV/Vis absorption spectra of activated P2@TCNB after exposure to VOCs .....</b> | <b>9</b>  |
| <b>4. Crystal data and structures.....</b>                                                              | <b>10</b> |
| <b>5. Macrocyclic-Based CT Cocrystals Adsorption Experiments.....</b>                                   | <b>18</b> |

## 1. Materials and Methods.

All reactions were carried out with oven-dried glassware. Commercial reagents were used without further purification.  $^1\text{H}$  NMR spectra were recorded on a Bruker DMX 400 NMR spectrometer. Single-crystal X-ray diffraction data were collected on a Bruker Smart APEXII CCD diffractometer using graphite monochromated Cu  $K\alpha$  ( $\lambda = 1.54184 \text{ \AA}$ ) radiation at 298 K.

**Powder X-ray diffraction (PXRD) data** were collected on a Rigaku Ultimate-IV X-ray diffractometer operating at 40 kV/30 mA using the Cu  $K\alpha$  line ( $\lambda = 1.5418 \text{ \AA}$ ). Data were measured over the range of 5-45° in 5°/min steps over 8 min.

**Vapochromic experiments.** An open 2 mL vial containing 25 mg of activated P2@TCNB was placed in a sealed 20 mL vial containing 1 mL of each vapor solution. Activated P2@TCNB powders were exposed under saturated vapor pressure in the closed vessel at room temperature. Obvious color changes were observed after 12 hours.

**Sample preparation of P2@TCNB.** P2 (10.4 mg) and TCNB (1.78 mg) were dissolved in 2 mL  $\text{CH}_2\text{Cl}_2$ , and then slowly evaporation of the solution at room temperature for 2 days, the red co-crystals P2@TCNB was obtained.

**Large scale preparation of P2@TCNB.** P2 (490 mg) and TCNB (84 mg) were dissolved in 50 mL  $\text{CH}_2\text{Cl}_2$ , and then slowly evaporation of the solution at room temperature for 3 days, the red co-crystals P2@TCNB was obtained.

**Adsorption Experiments.** In a typical solid-vapor adsorption experiment, an open vial (4 mL) containing 5 mg of activated P2@TCNB was placed into a sealed vial (20 mL) containing 1 mL of benzene or mixture vapor. The adsorption process was monitored over time by completely dissolving a portion of the crystals in  $\text{CDCl}_3$  and measuring  $^1\text{H}$  NMR spectra.

## 2. Characterization of Macrocycle-Based CT Cocrystals

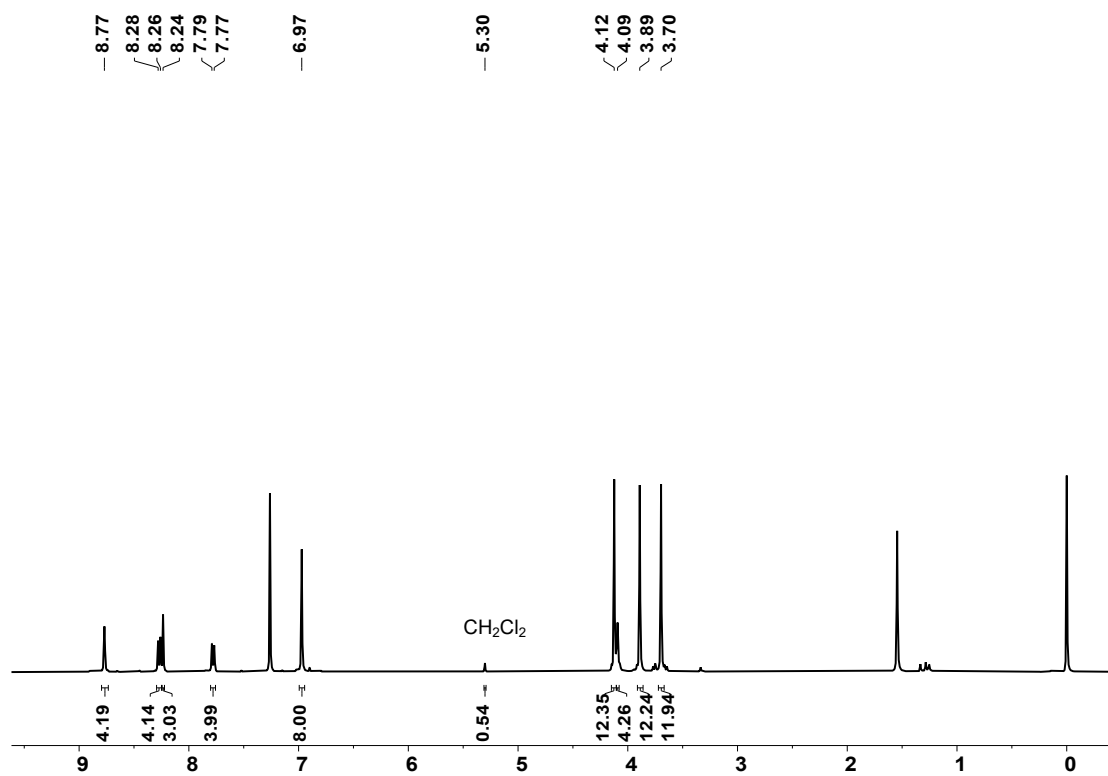

Figure S1. <sup>1</sup>H NMR spectrum (400 MHz, CDCl<sub>3</sub>, 298K) of activated P2@TCNB

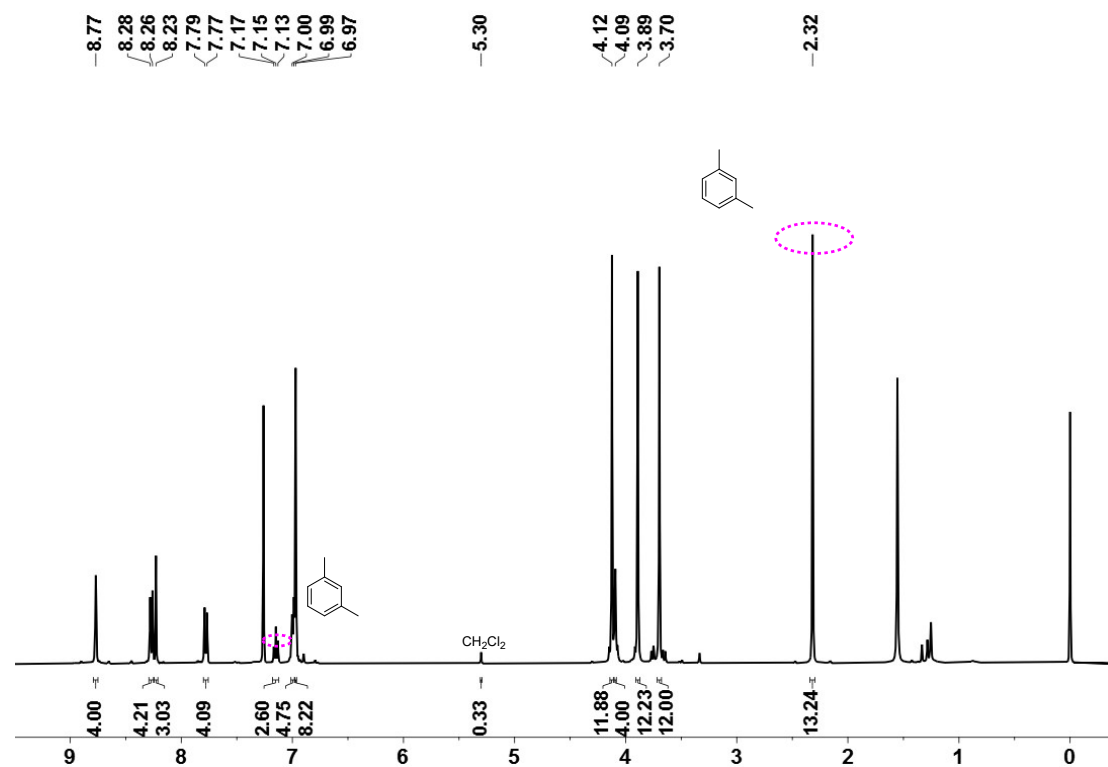

Figure S2. <sup>1</sup>H NMR spectrum (400 MHz, CDCl<sub>3</sub>, 298K) of activated P2@TCNB after exposure to *m*-Xylene

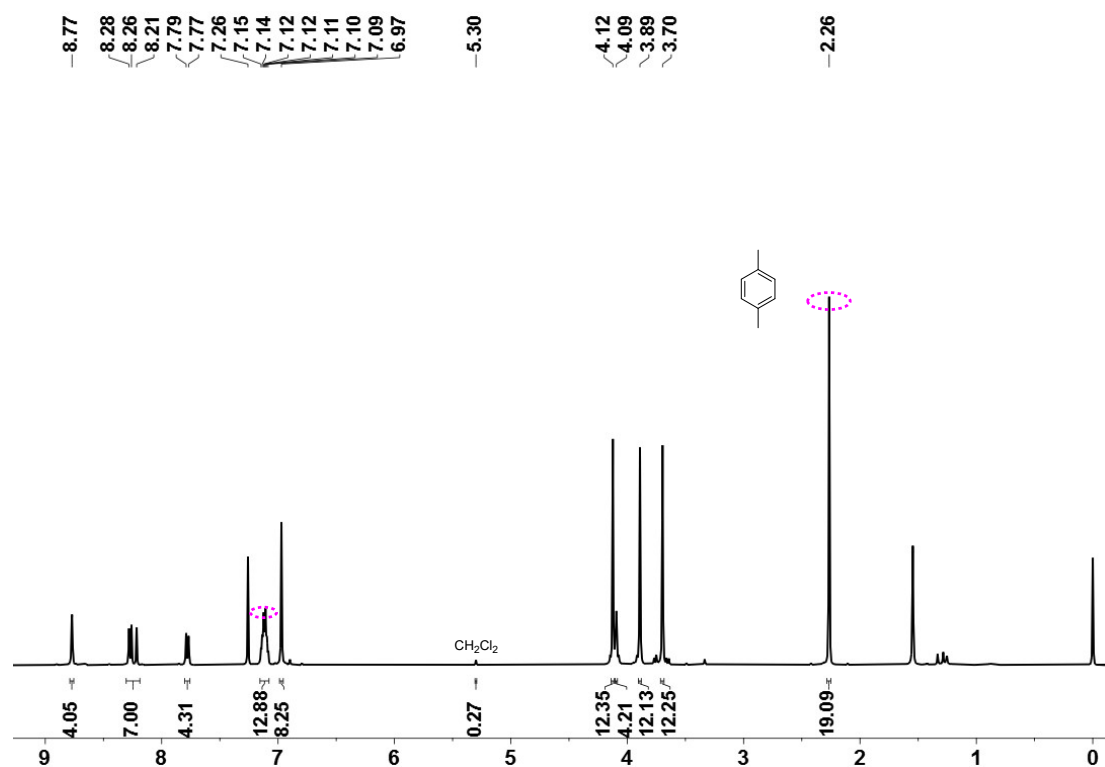

**Figure S3.**  $^1\text{H}$  NMR spectrum (400 MHz,  $\text{CDCl}_3$ , 298K) of activated P2@TCNB after exposure to *p*-Xylene

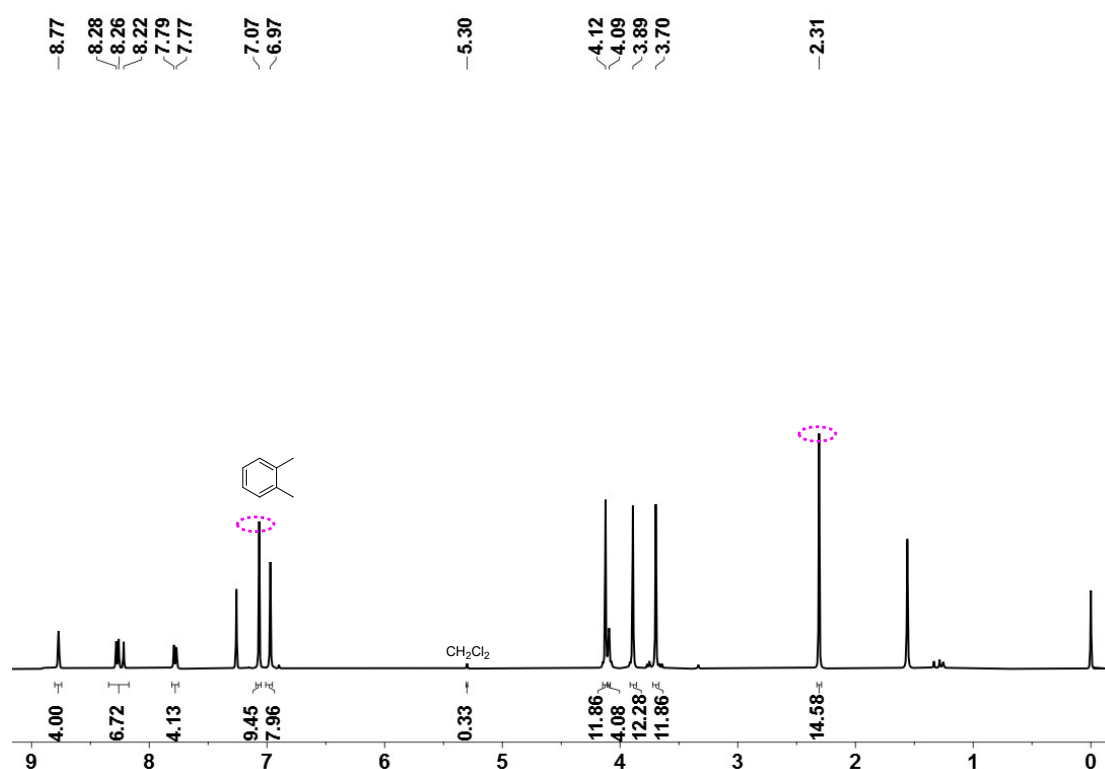

**Figure S4.**  $^1\text{H}$  NMR spectrum (400 MHz,  $\text{CDCl}_3$ , 298K) of activated P2@TCNB after exposure to *o*-Xylene

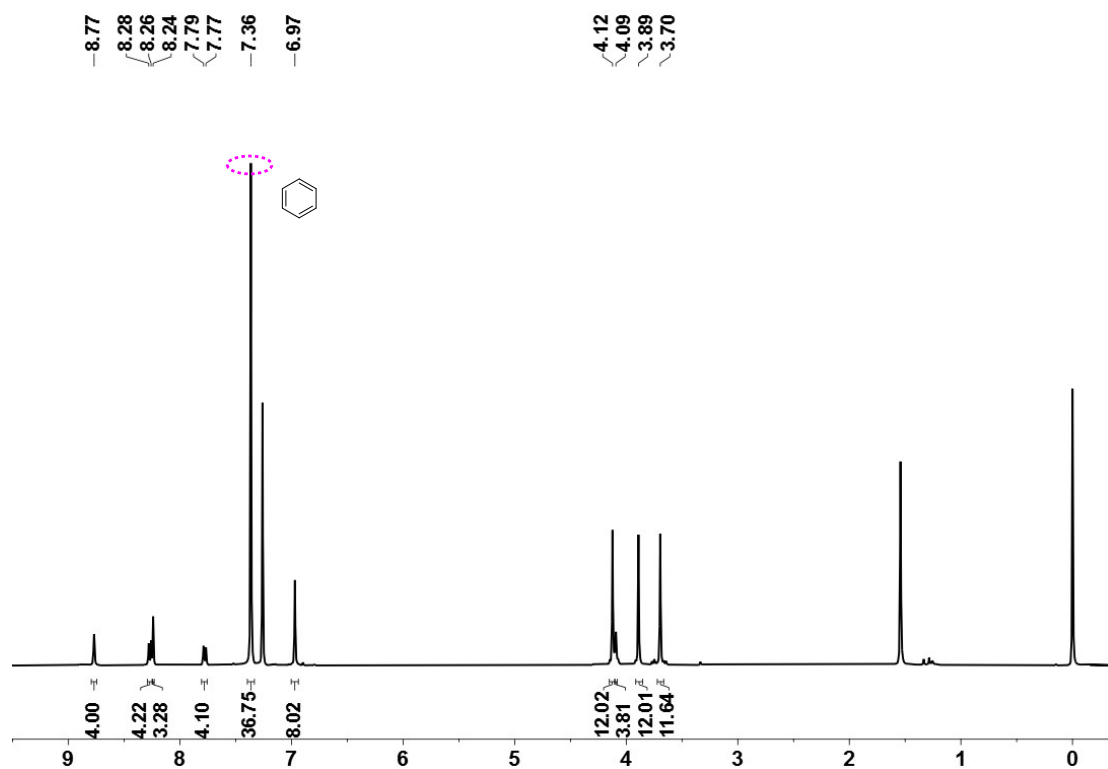

**Figure S5.**  $^1\text{H}$  NMR spectrum (400 MHz,  $\text{CDCl}_3$ , 298K) of activated P2@TCNB after exposure to benzene

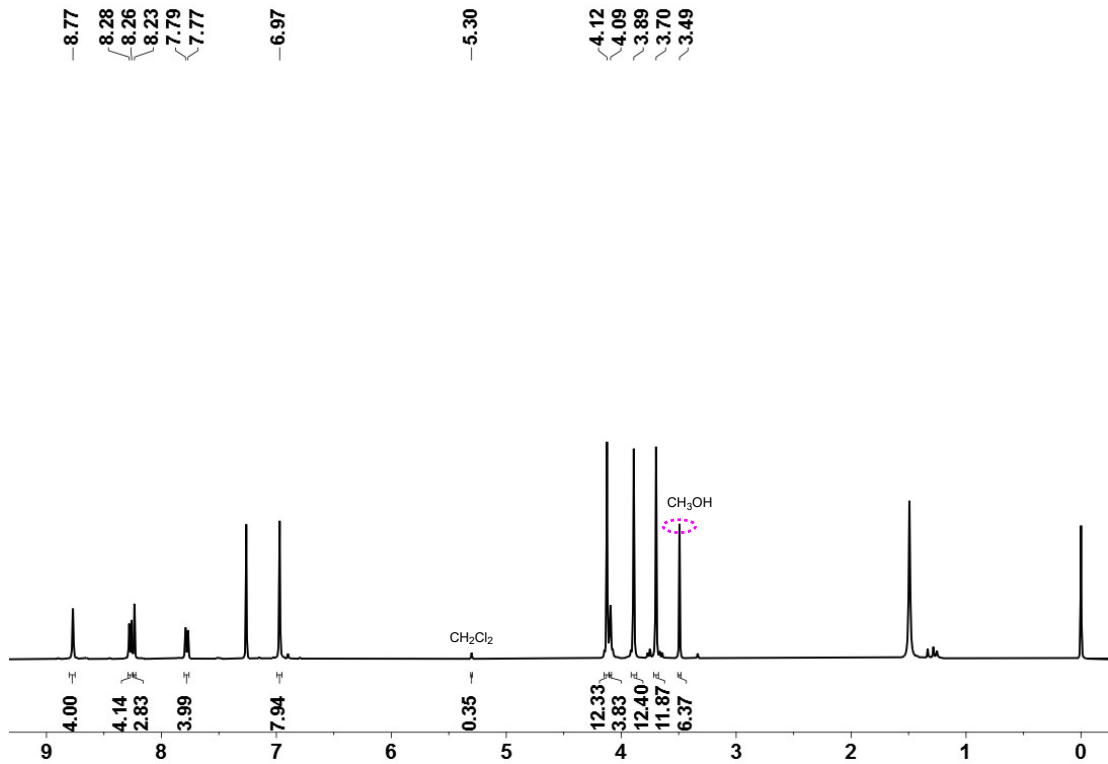

**Figure S6.**  $^1\text{H}$  NMR spectrum (400 MHz,  $\text{CDCl}_3$ , 298K) of activated P2@TCNB after exposure to  $\text{CH}_3\text{OH}$

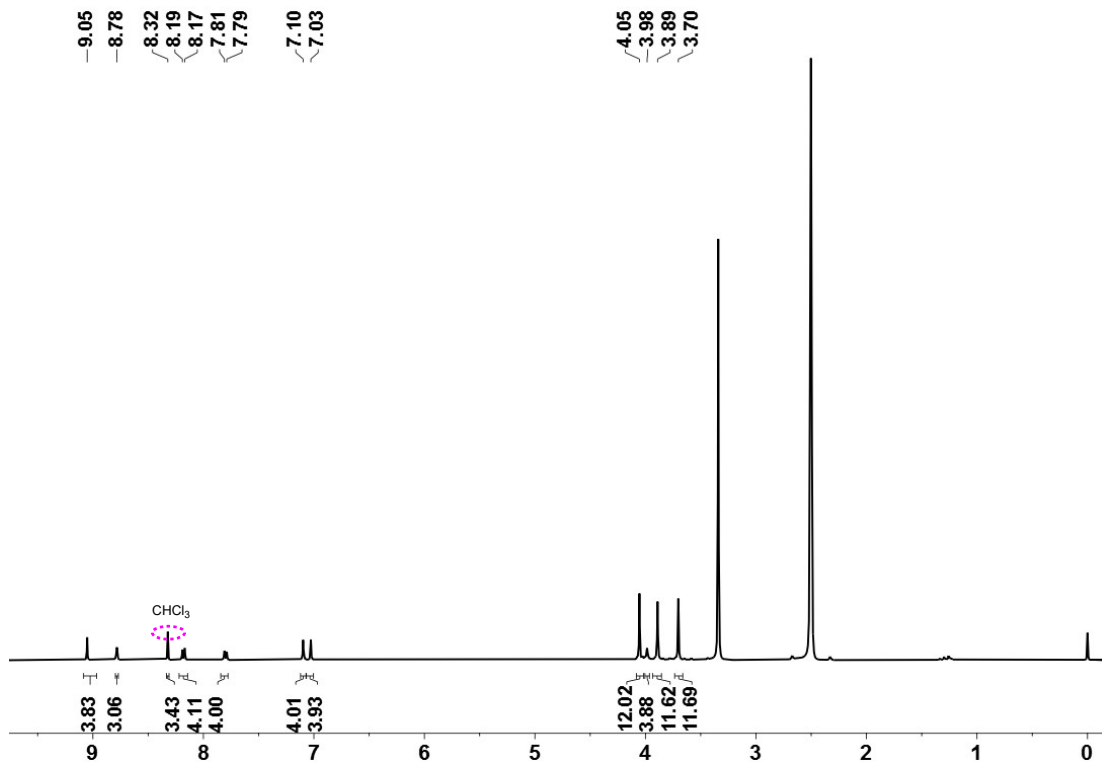

**Figure S7.**  $^1\text{H}$  NMR spectrum (400 MHz, Dimethyl Sulfoxide- $d_6$ , 298K) of activated P2@TCNB after exposure to  $\text{CHCl}_3$

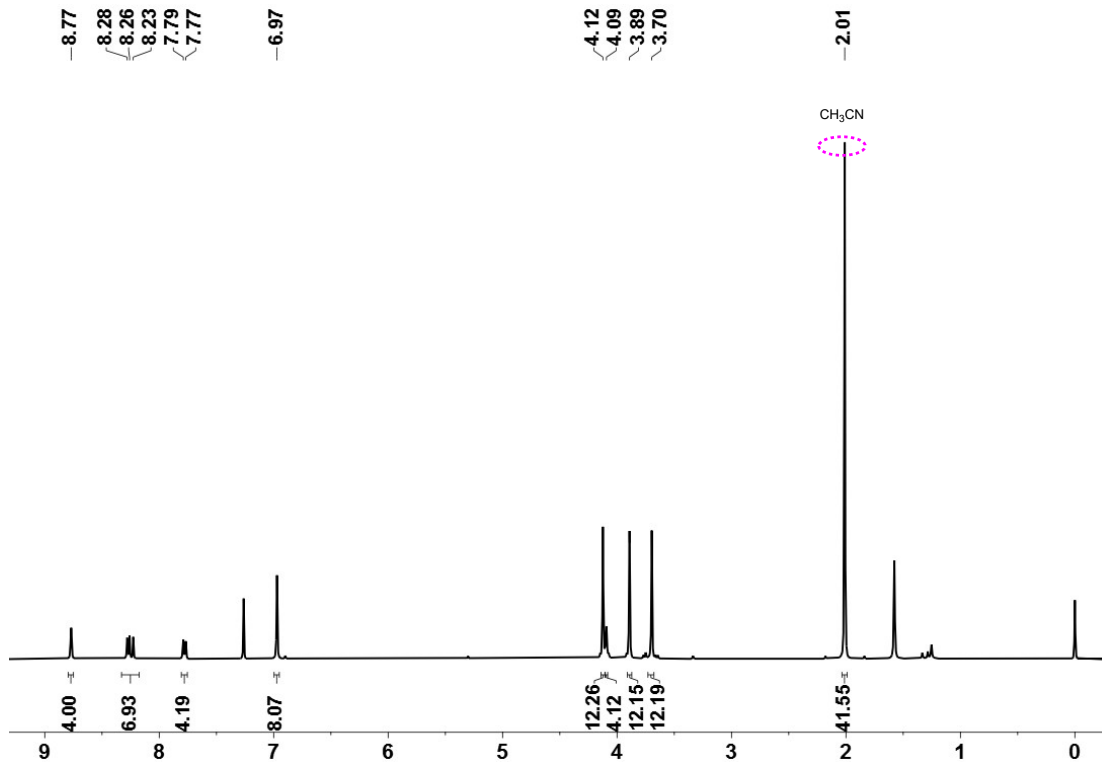

**Figure S8.**  $^1\text{H}$  NMR spectrum (400 MHz,  $\text{CDCl}_3$ , 298K) of activated P2@TCNB after exposure to  $\text{CH}_3\text{CN}$

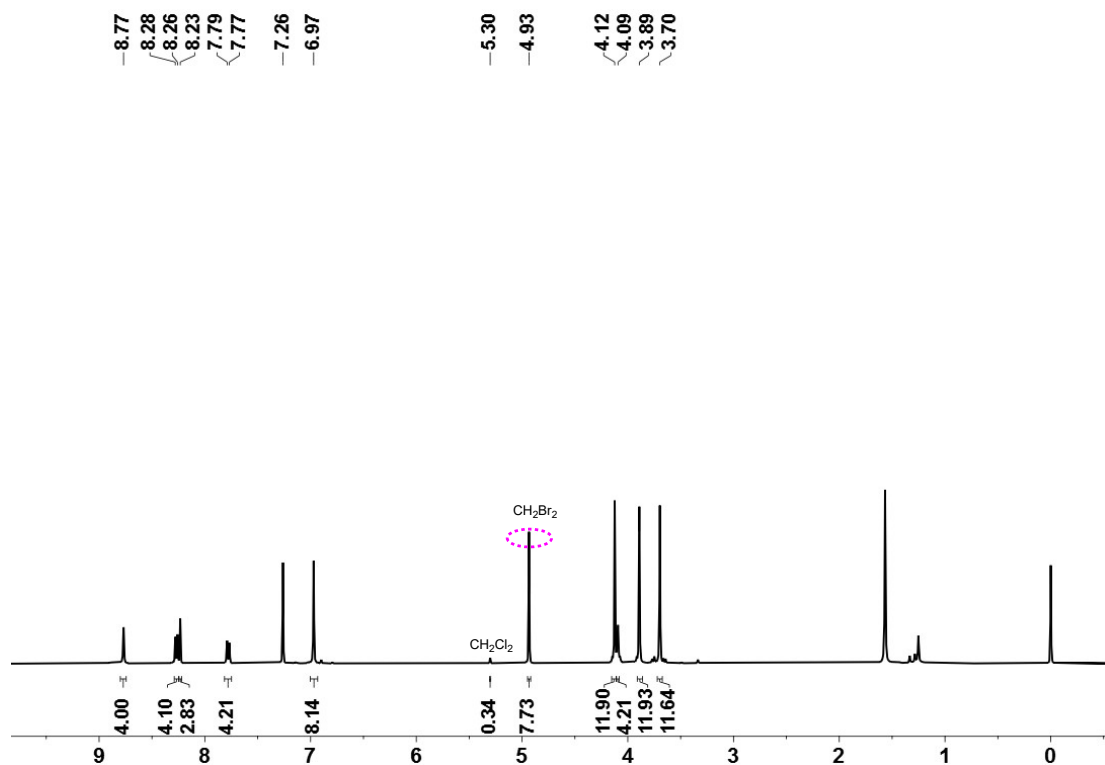

**Figure S9.** <sup>1</sup>H NMR spectrum (400 MHz, CDCl<sub>3</sub>, 298K) of activated P2@TCNB after exposure to CH<sub>2</sub>Br<sub>2</sub>

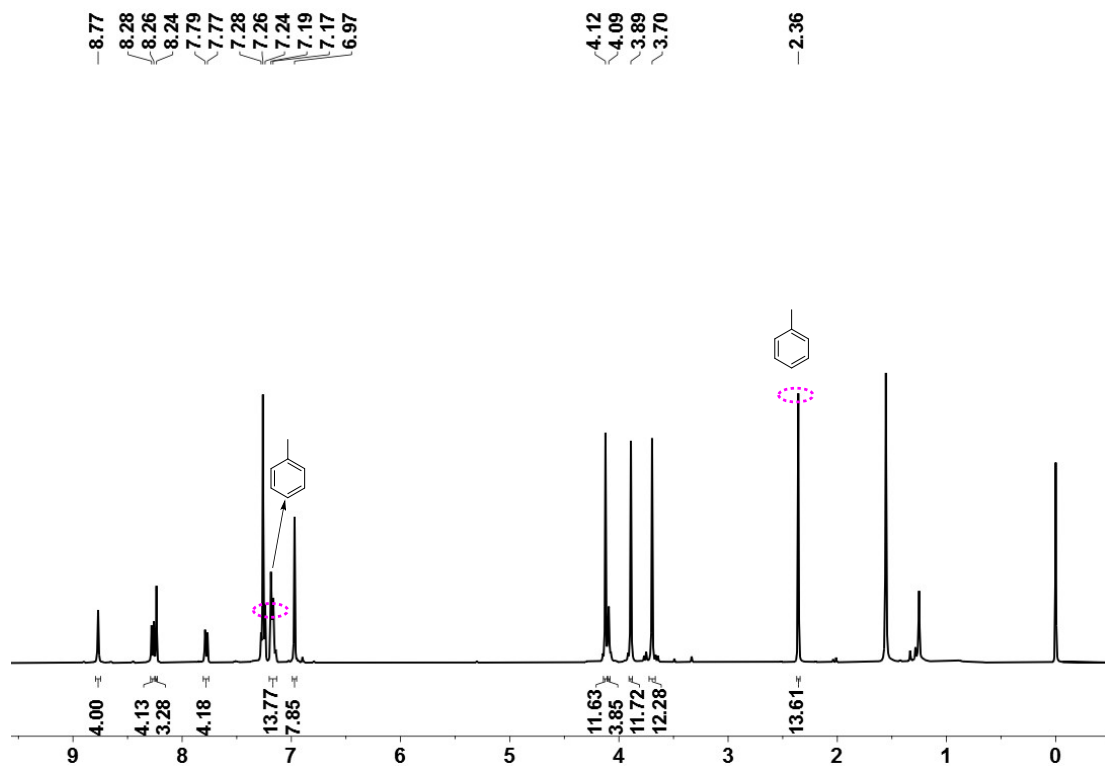

**Figure S10.** <sup>1</sup>H NMR spectrum (400 MHz, CDCl<sub>3</sub>, 298K) of activated P2@TCNB after exposure to toluene

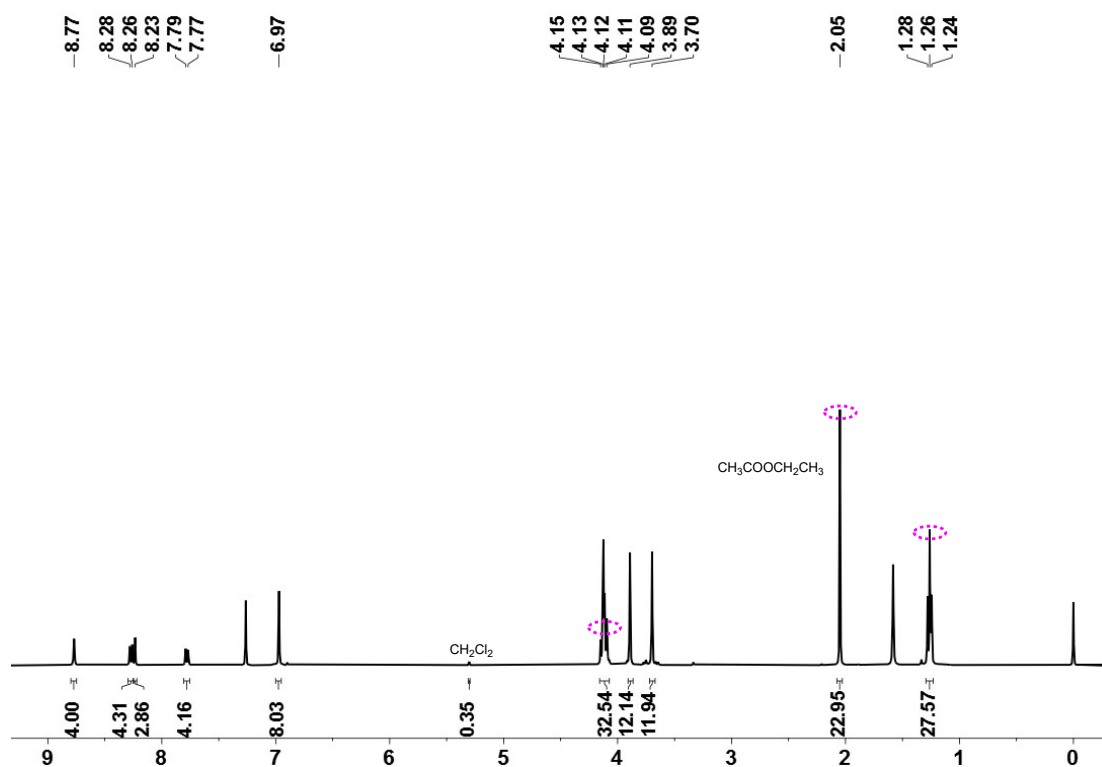

**Figure S11.**  $^1\text{H}$  NMR spectrum (400 MHz,  $\text{CDCl}_3$ , 298K) of activated P2@TCNB after exposure to ethyl acetate

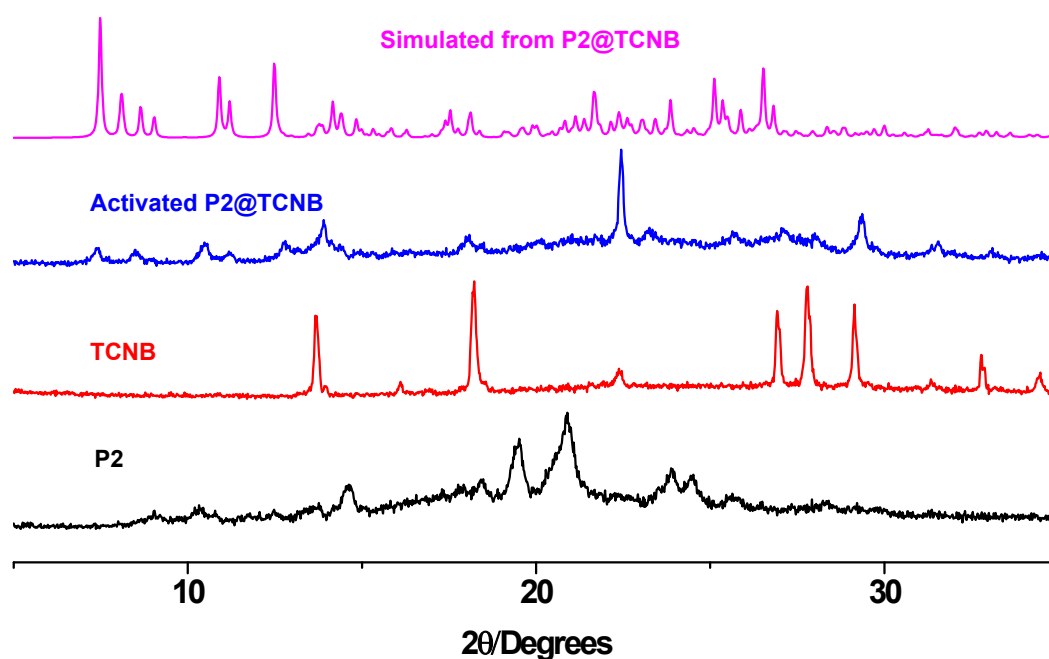

**Figure S12.** PXRD patterns of P2, activated P2@TCNB, TCNB and simulated from P2@TCNB



3. PXRD patterns and UV/Vis absorption spectra of activated P2@TCNB after exposure to VOCs

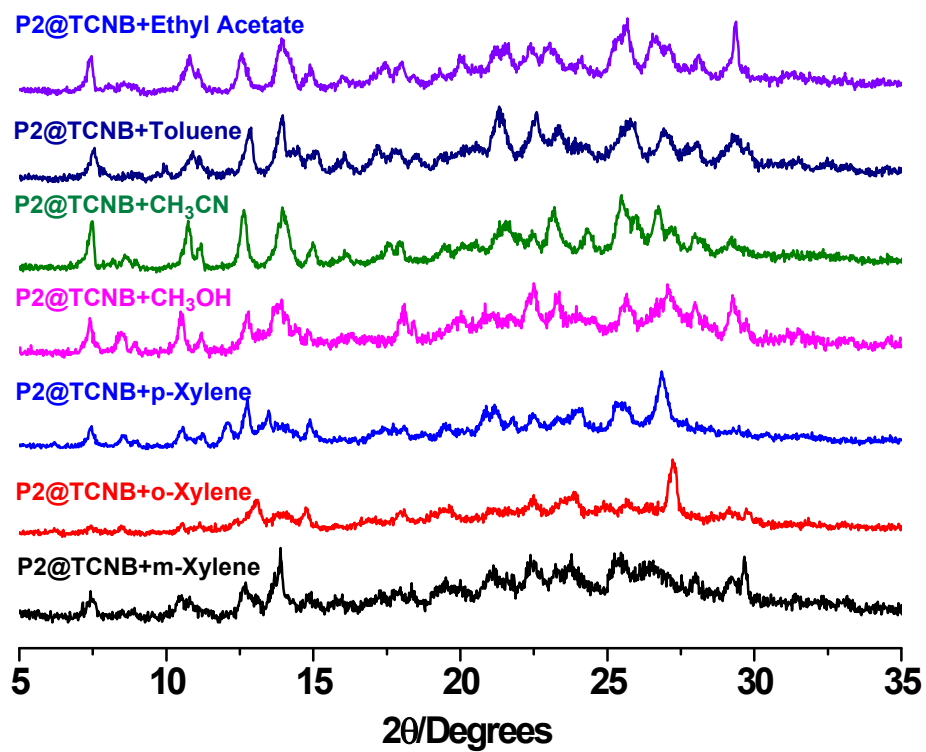

**Figure S13.** PXRD patterns of activated P2@TCNB after exposure to *o*-Xylene, *m*-Xylene, *p*-Xylene, toluene, CH<sub>3</sub>OH and ethyl acetate

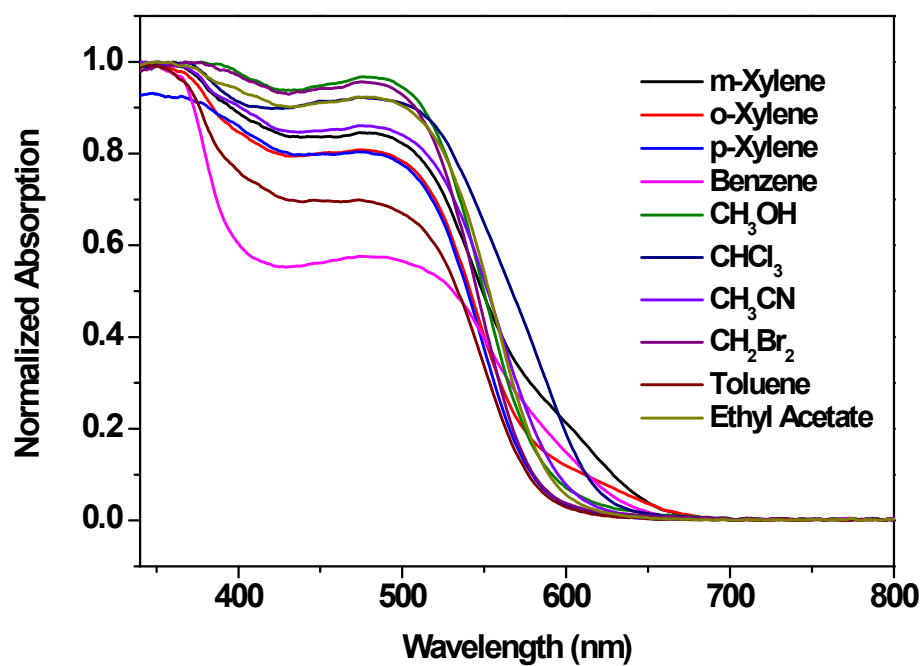

**Figure S14.** Solid-state UV/Vis absorption spectra of activated P2@TCNB after exposure to VOCs.

#### 4. Crystal data and structures

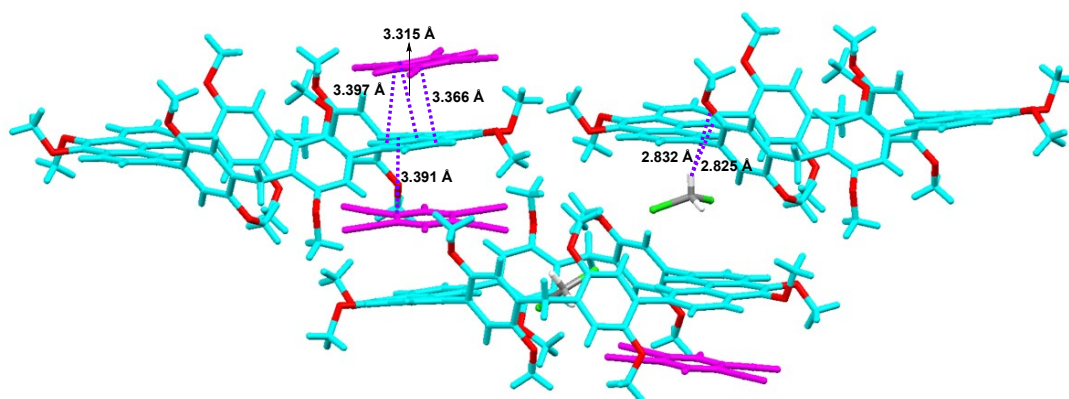

**Figure S15.** Crystal structure of P2@TCNB

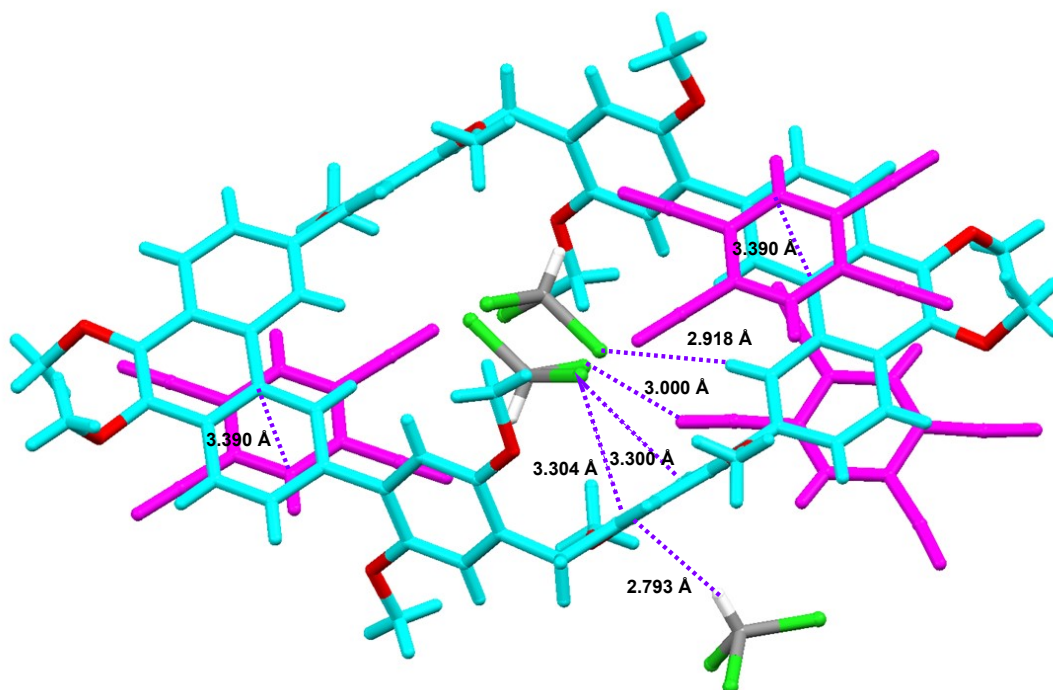

**Figure S16.** Crystal structure of P2@TCNB@CHCl<sub>3</sub>

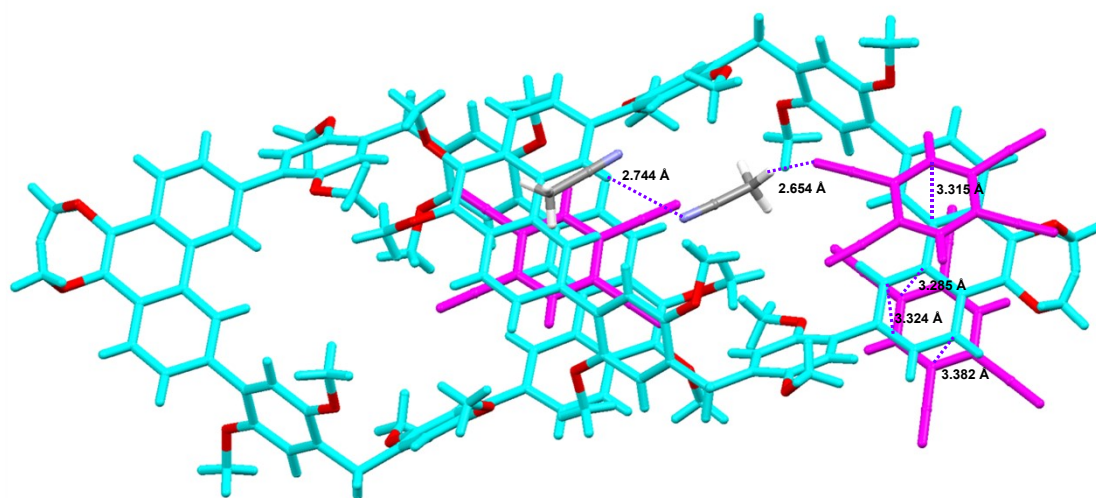

**Figure S17.** Crystal structure of P2@TCNB@CH<sub>3</sub>CN

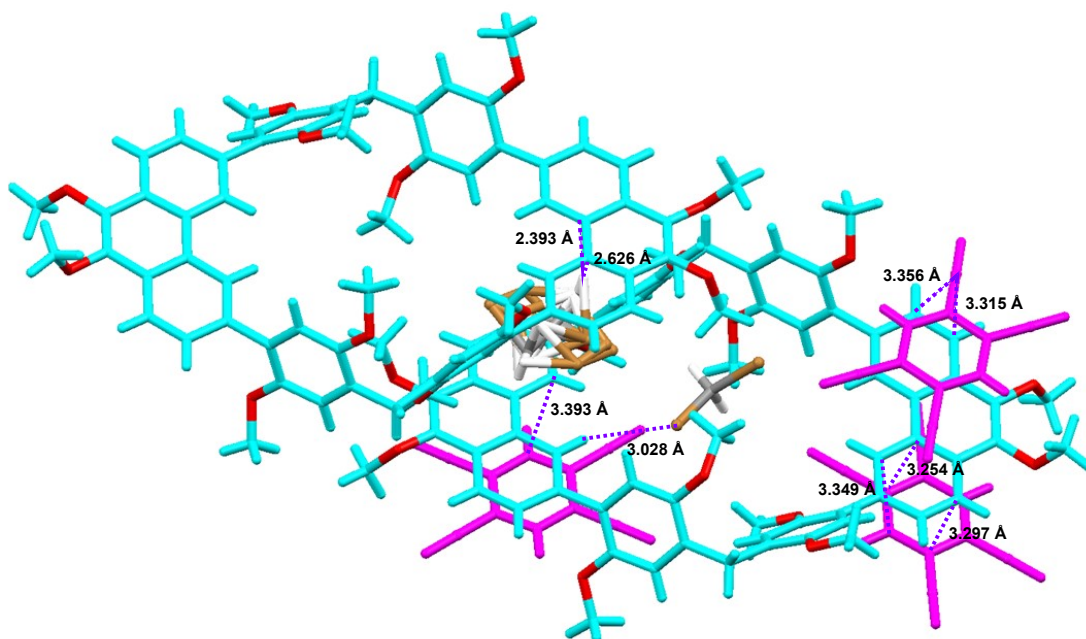

**Figure S18.** Crystal structure of P2@TCNB@CH<sub>2</sub>Br<sub>2</sub>

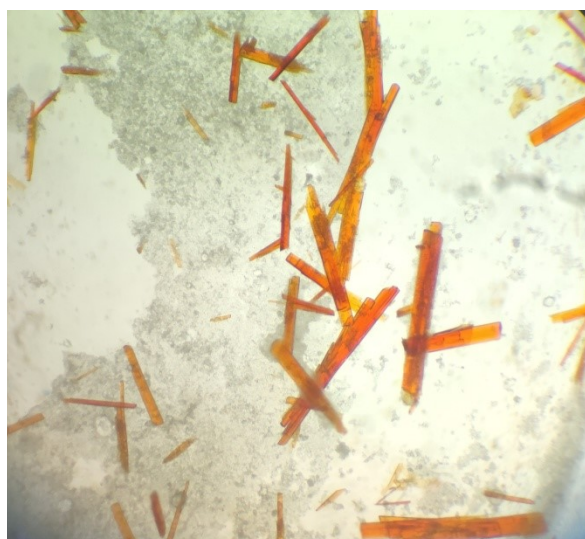

**Figure S19.** Picture of P2@TCNB single crystal

**Table 1 Crystal data and structure refinement for P2@TCNB.**

|                     |                                                                                |
|---------------------|--------------------------------------------------------------------------------|
| Identification code | P2@TCNB                                                                        |
| Empirical formula   | C <sub>83</sub> H <sub>67</sub> Cl <sub>4</sub> N <sub>6</sub> O <sub>12</sub> |
| Formula weight      | 1482.22                                                                        |
| Temperature/K       | 296.15(10)                                                                     |
| Crystal system      | triclinic                                                                      |
| Space group         | P-1                                                                            |
| a/Å                 | 12.939(2)                                                                      |
| b/Å                 | 13.108(2)                                                                      |

|                                                |                                                                |
|------------------------------------------------|----------------------------------------------------------------|
| $c/\text{\AA}$                                 | 23.799(4)                                                      |
| $\alpha/^\circ$                                | 95.070(2)                                                      |
| $\beta/^\circ$                                 | 92.406(2)                                                      |
| $\gamma/^\circ$                                | 113.497(2)                                                     |
| Volume/ $\text{\AA}^3$                         | 3673.8(11)                                                     |
| Z                                              | 2                                                              |
| $\rho_{\text{calc}}/\text{g/cm}^3$             | 1.340                                                          |
| $\mu/\text{mm}^{-1}$                           | 0.230                                                          |
| F(000)                                         | 1542.0                                                         |
| Crystal size/ $\text{mm}^3$                    | $0.15 \times 0.13 \times 0.11$                                 |
| Radiation                                      | MoK $\alpha$ ( $\lambda = 0.71073$ )                           |
| 2 $\Theta$ range for data collection/ $^\circ$ | 3.41 to 50.054                                                 |
| Index ranges                                   | $-15 \leq h \leq 15, -15 \leq k \leq 15, -28 \leq l \leq 28$   |
| Reflections collected                          | 35507                                                          |
| Independent reflections                        | 12938 [ $R_{\text{int}} = 0.0436, R_{\text{sigma}} = 0.0642$ ] |
| Data/restraints/parameters                     | 12938/302/1073                                                 |
| Goodness-of-fit on $F^2$                       | 0.994                                                          |
| Final R indexes [ $I \geq 2\sigma(I)$ ]        | $R_1 = 0.0657, wR_2 = 0.1759$                                  |
| Final R indexes [all data]                     | $R_1 = 0.1455, wR_2 = 0.2247$                                  |
| Largest diff. peak/hole / $e \text{\AA}^{-3}$  | 0.30/-0.38                                                     |

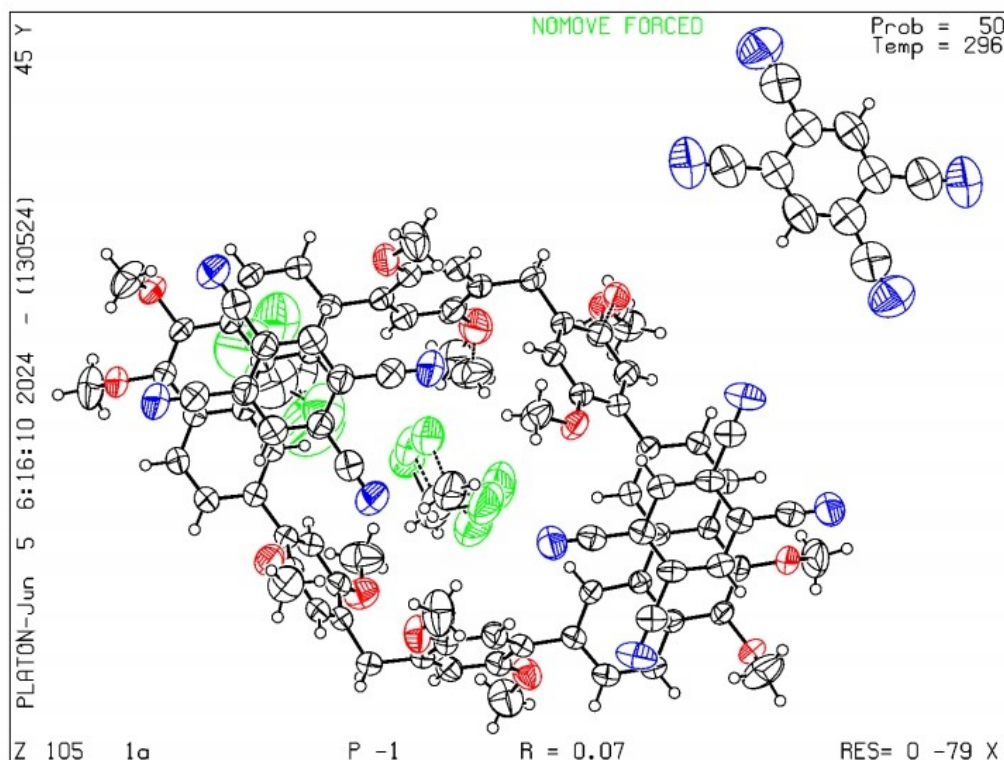

**Table 2 Crystal data and structure refinement for P2@TCNB@CHCl<sub>3</sub>.**

Identification code P2@TCNB@CHCl<sub>3</sub>

|                                             |                                                                                |
|---------------------------------------------|--------------------------------------------------------------------------------|
| Empirical formula                           | C <sub>89</sub> H <sub>67</sub> Cl <sub>9</sub> N <sub>8</sub> O <sub>12</sub> |
| Formula weight                              | 1759.55                                                                        |
| Temperature/K                               | 296.15(10)                                                                     |
| Crystal system                              | triclinic                                                                      |
| Space group                                 | P-1                                                                            |
| a/Å                                         | 13.062(6)                                                                      |
| b/Å                                         | 13.259(6)                                                                      |
| c/Å                                         | 13.970(6)                                                                      |
| α/°                                         | 70.993(6)                                                                      |
| β/°                                         | 70.564(6)                                                                      |
| γ/°                                         | 72.967(6)                                                                      |
| Volume/Å <sup>3</sup>                       | 2110.4(16)                                                                     |
| Z                                           | 1                                                                              |
| ρ <sub>calc</sub> /g/cm <sup>3</sup>        | 1.384                                                                          |
| μ/mm <sup>-1</sup>                          | 0.366                                                                          |
| F(000)                                      | 906.0                                                                          |
| Crystal size/mm <sup>3</sup>                | 0.15 × 0.13 × 0.11                                                             |
| Radiation                                   | MoKα (λ = 0.71073)                                                             |
| 2θ range for data collection/°              | 3.196 to 50.054                                                                |
| Index ranges                                | -15 ≤ h ≤ 15, -15 ≤ k ≤ 15, -16 ≤ l ≤ 16                                       |
| Reflections collected                       | 20443                                                                          |
| Independent reflections                     | 7439 [R <sub>int</sub> = 0.0703, R <sub>sigma</sub> = 0.1264]                  |
| Data/restraints/parameters                  | 7439/401/694                                                                   |
| Goodness-of-fit on F <sup>2</sup>           | 0.982                                                                          |
| Final R indexes [I >= 2σ (I)]               | R <sub>1</sub> = 0.0820, wR <sub>2</sub> = 0.2156                              |
| Final R indexes [all data]                  | R <sub>1</sub> = 0.2047, wR <sub>2</sub> = 0.2927                              |
| Largest diff. peak/hole / e Å <sup>-3</sup> | 0.44/-0.31                                                                     |

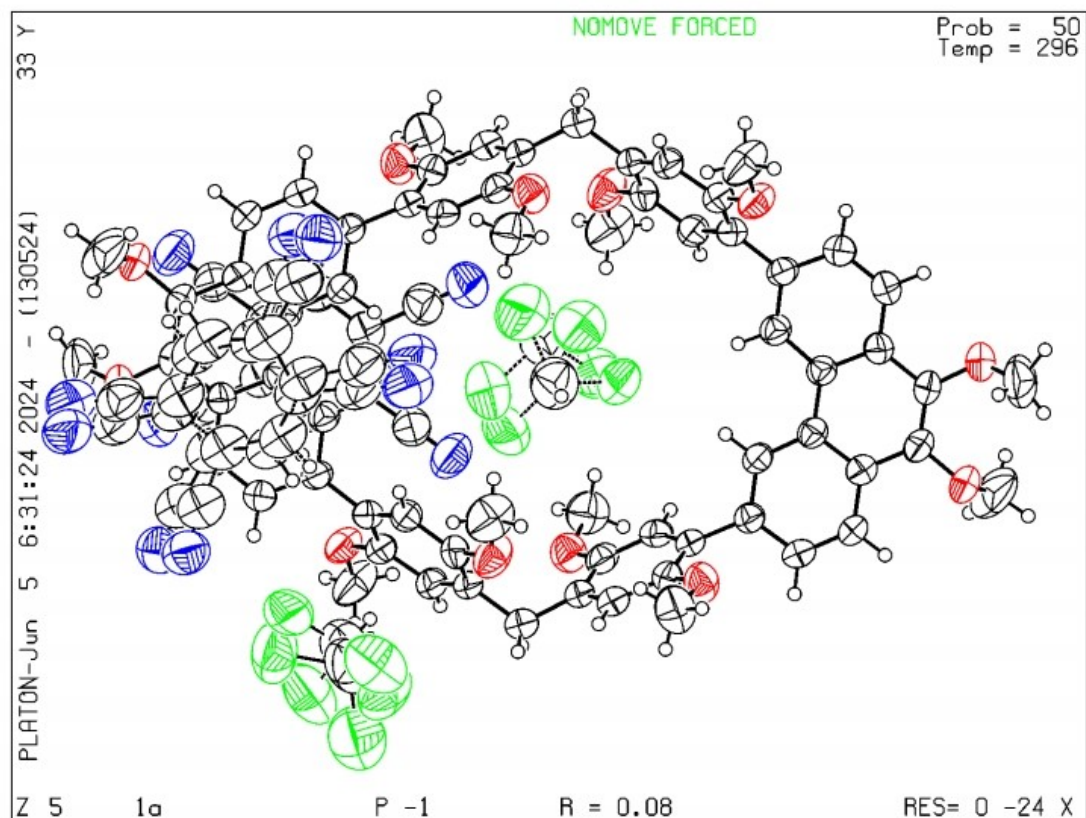

**Table 3 Crystal data and structure refinement for P2@TCNB@CH<sub>3</sub>CN.**

|                                    |                                                                |
|------------------------------------|----------------------------------------------------------------|
| Identification code                | P2@TCNB@CH <sub>3</sub> CN                                     |
| Empirical formula                  | C <sub>85</sub> H <sub>69</sub> N <sub>8</sub> O <sub>12</sub> |
| Formula weight                     | 1394.48                                                        |
| Temperature/K                      | 296.15                                                         |
| Crystal system                     | triclinic                                                      |
| Space group                        | P-1                                                            |
| a/Å                                | 12.982(7)                                                      |
| b/Å                                | 13.032(7)                                                      |
| c/Å                                | 23.658(13)                                                     |
| α/°                                | 91.171(8)                                                      |
| β/°                                | 94.196(8)                                                      |
| γ/°                                | 114.981(7)                                                     |
| Volume/Å <sup>3</sup>              | 3612(4)                                                        |
| Z                                  | 2                                                              |
| ρ <sub>calc</sub> /cm <sup>3</sup> | 1.282                                                          |
| μ/mm <sup>-1</sup>                 | 0.087                                                          |
| F(000)                             | 1462.0                                                         |
| Crystal size/mm <sup>3</sup>       | 0.45 × 0.23 × 0.2                                              |
| Radiation                          | MoKα (λ = 0.71073)                                             |

|                                                  |                                                                    |
|--------------------------------------------------|--------------------------------------------------------------------|
| 2 $\theta$ range for data collection/ $^{\circ}$ | 1.728 to 55.206                                                    |
| Index ranges                                     | $-16 \leq h \leq 16$ , $-16 \leq k \leq 16$ , $-30 \leq l \leq 30$ |
| Reflections collected                            | 40489                                                              |
| Independent reflections                          | 15989 [ $R_{\text{int}} = 0.0745$ , $R_{\text{sigma}} = 0.1036$ ]  |
| Data/restraints/parameters                       | 15989/48/960                                                       |
| Goodness-of-fit on $F^2$                         | 0.944                                                              |
| Final R indexes [ $I \geq 2\sigma(I)$ ]          | $R_1 = 0.0808$ , $wR_2 = 0.2106$                                   |
| Final R indexes [all data]                       | $R_1 = 0.1828$ , $wR_2 = 0.2844$                                   |
| Largest diff. peak/hole / $e \text{ \AA}^{-3}$   | 0.37/-0.36                                                         |

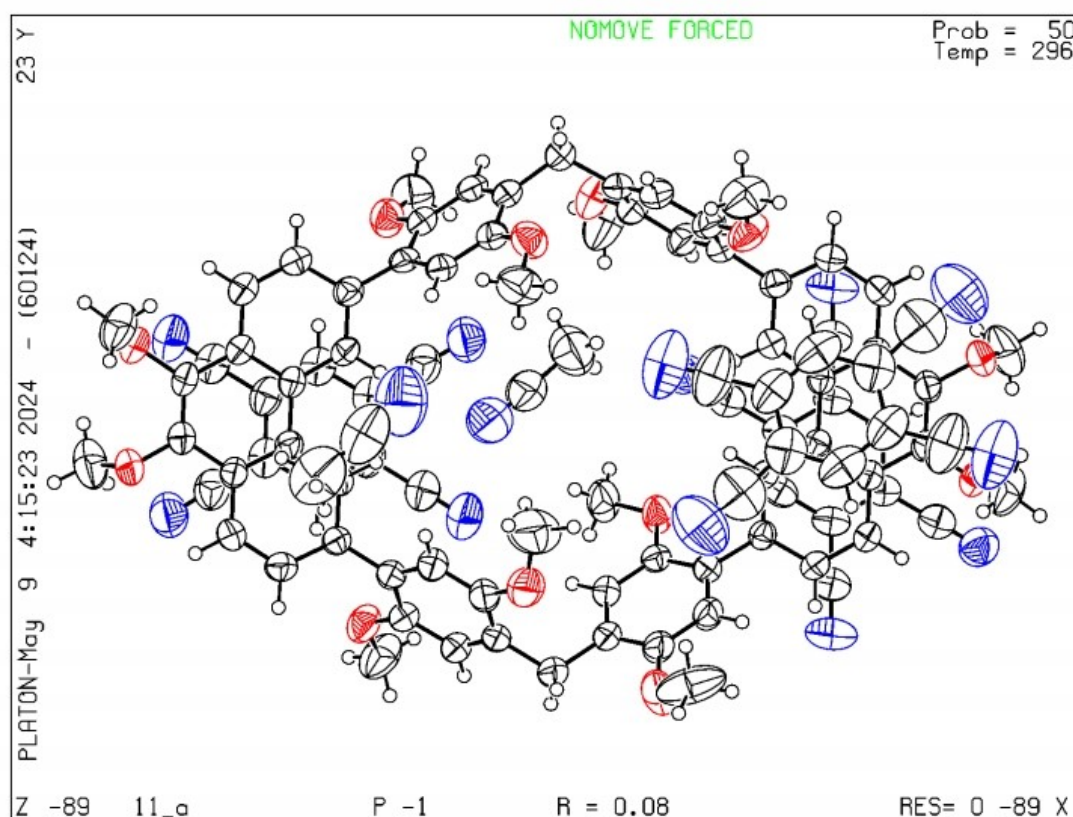

**Table 4 Crystal data and structure refinement for P2@TCNB@CH<sub>2</sub>Br<sub>2</sub>.**

|                     |                                                                                   |
|---------------------|-----------------------------------------------------------------------------------|
| Identification code | P2@TCNB@CH <sub>2</sub> Br <sub>2</sub>                                           |
| Empirical formula   | C <sub>165</sub> H <sub>132</sub> Br <sub>6</sub> N <sub>12</sub> O <sub>24</sub> |
| Formula weight      | 3146.28                                                                           |
| Temperature/K       | 296.15(10)                                                                        |
| Crystal system      | triclinic                                                                         |
| Space group         | P-1                                                                               |
| a/Å                 | 12.903(3)                                                                         |
| b/Å                 | 13.152(3)                                                                         |
| c/Å                 | 23.932(6)                                                                         |
| $\alpha/^{\circ}$   | 86.210(3)                                                                         |
| $\beta/^{\circ}$    | 88.225(3)                                                                         |



|                                               |                                                                |
|-----------------------------------------------|----------------------------------------------------------------|
| $\gamma/^\circ$                               | 64.678(3)                                                      |
| Volume/ $\text{\AA}^3$                        | 3663.0(15)                                                     |
| Z                                             | 1                                                              |
| $\rho_{\text{calc}}/\text{g/cm}^3$            | 1.426                                                          |
| $\mu/\text{mm}^{-1}$                          | 1.720                                                          |
| F(000)                                        | 1608.0                                                         |
| Crystal size/ $\text{mm}^3$                   | $0.15 \times 0.13 \times 0.12$                                 |
| Radiation                                     | MoK $\alpha$ ( $\lambda = 0.71073$ )                           |
| $2\theta$ range for data collection/ $^\circ$ | 3.412 to 49.498                                                |
| Index ranges                                  | $-15 \leq h \leq 15, -15 \leq k \leq 15, -28 \leq l \leq 28$   |
| Reflections collected                         | 34619                                                          |
| Independent reflections                       | 12528 [ $R_{\text{int}} = 0.0737, R_{\text{sigma}} = 0.1096$ ] |
| Data/restraints/parameters                    | 12528/142/1025                                                 |
| Goodness-of-fit on $F^2$                      | 1.002                                                          |
| Final R indexes [ $I \geq 2\sigma(I)$ ]       | $R_1 = 0.0712, wR_2 = 0.1736$                                  |
| Final R indexes [all data]                    | $R_1 = 0.1947, wR_2 = 0.2360$                                  |
| Largest diff. peak/hole / $e \text{\AA}^{-3}$ | 0.69/-0.62                                                     |

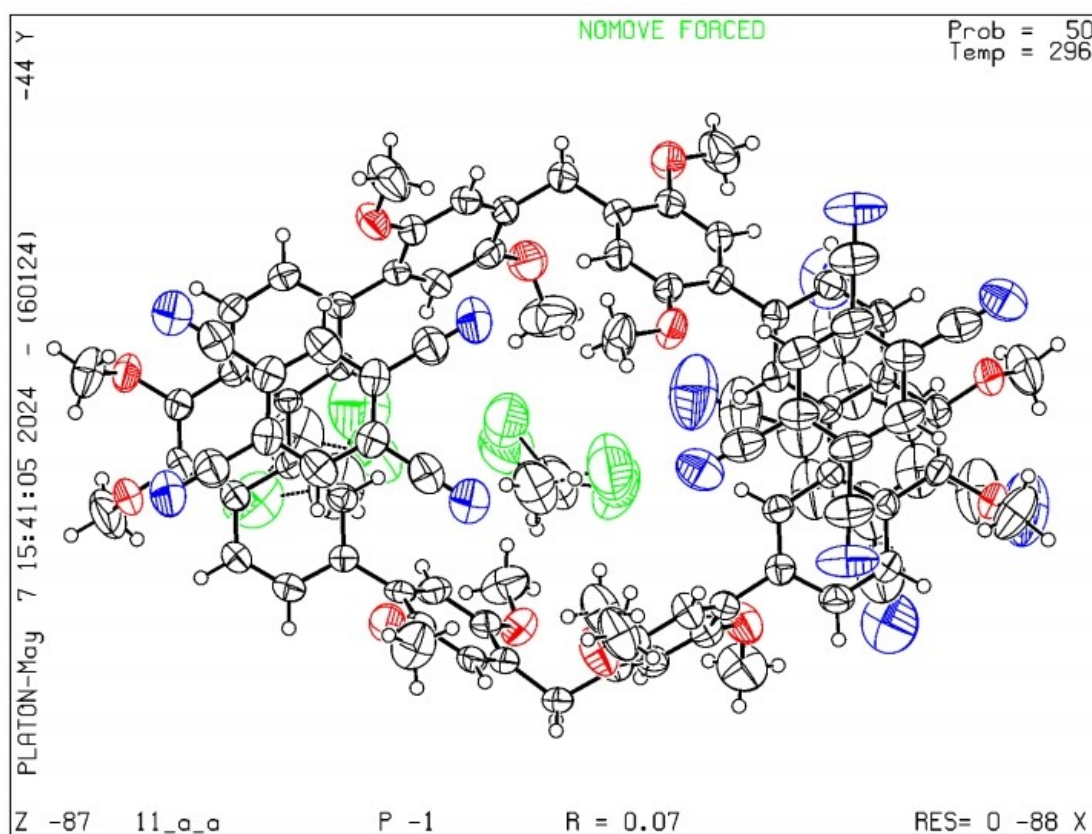

**Table 1** Amount of VOCs absorption by activated P2@TCNB

| VOCs             | Amount of VOCs over P2 |
|------------------|------------------------|
| <i>o</i> -Xylene | 2.43                   |

|                                 |       |
|---------------------------------|-------|
| <i>m</i> -Xylene                | 2.20  |
| <i>p</i> -Xylene                | 3.18  |
| benzene                         | 6.13  |
| toluene                         | 4.54  |
| CH <sub>3</sub> OH              | 2.12  |
| CHCl <sub>3</sub>               | 3.43  |
| CH <sub>3</sub> CN              | 13.85 |
| CH <sub>2</sub> Br <sub>2</sub> | 3.87  |
| ethyl acetate                   | 7.65  |

## 5. Macrocycle-Based CT Cocrystals Adsorption Experiments

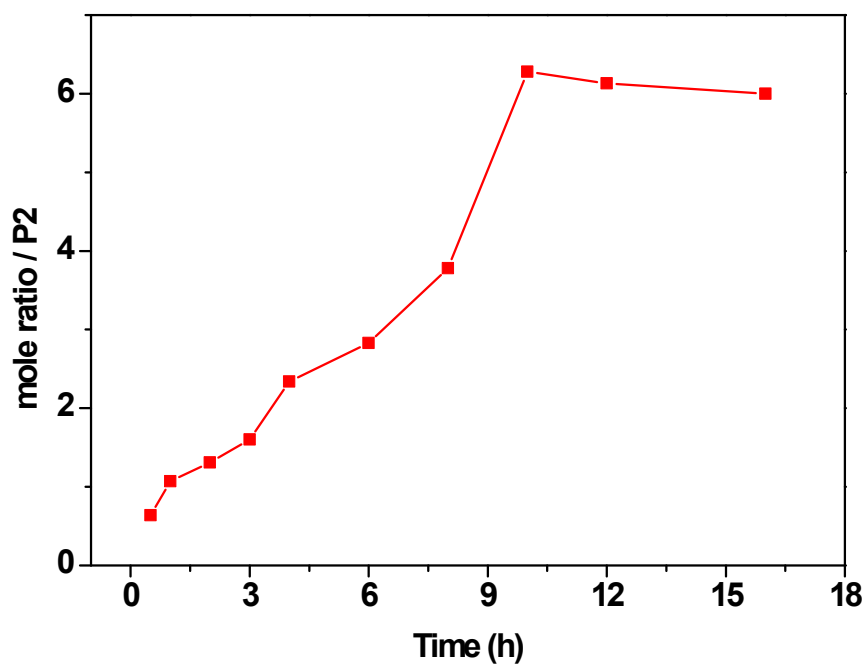

**Figure S20.** Time-dependent solid-vapor sorption plots of activated P2@TCNB for benzene vapor

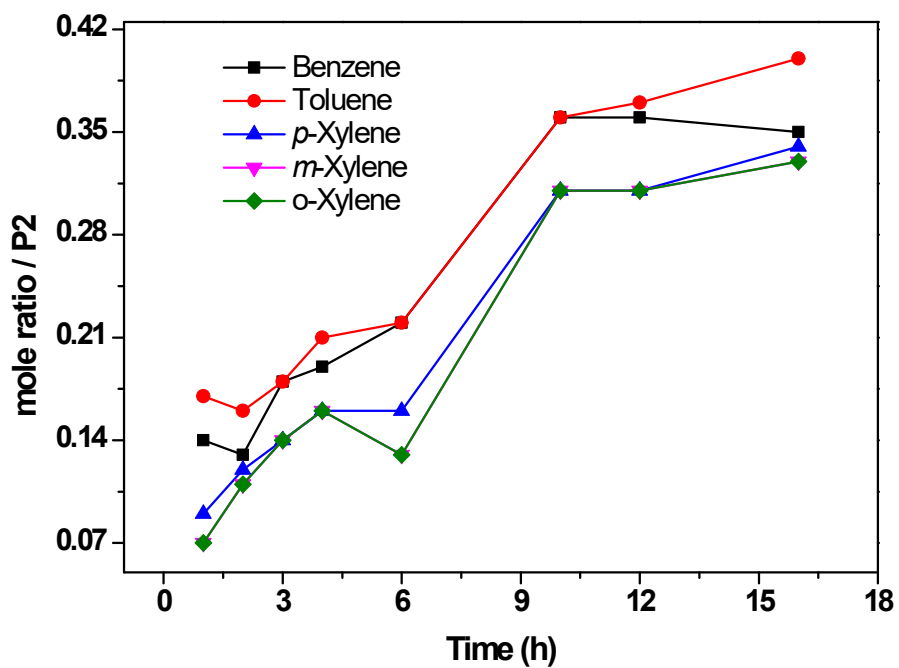

**Figure S21.** Time-dependent solid-vapor sorption plots of activated P2@TCNB for the mixture vapor (benzene : toluene : p-xylene : m-xylene : o-xylene = 1:1:1:1:1; v/v)
